# Supplementary material for: Time-dependent quantum mechanical wave packet dynamics
Source: Royal Society of Chemistry journal article supplement (doi:10.1039/d0cp03929b), 2020-10-19
Supplement: d0cp03929b1.pdf [file d0cp03929b1.pdf]

Supplementary Material  
Time-dependent quantum mechanical wave  
packet dynamics

Narayanasami Sathyamurthy and Susanta Mahapatra

He + H<sub>2</sub><sup>+</sup> → HeH<sup>+</sup> + H reaction in scaled and skewed coordinates  
for the collinear geometry

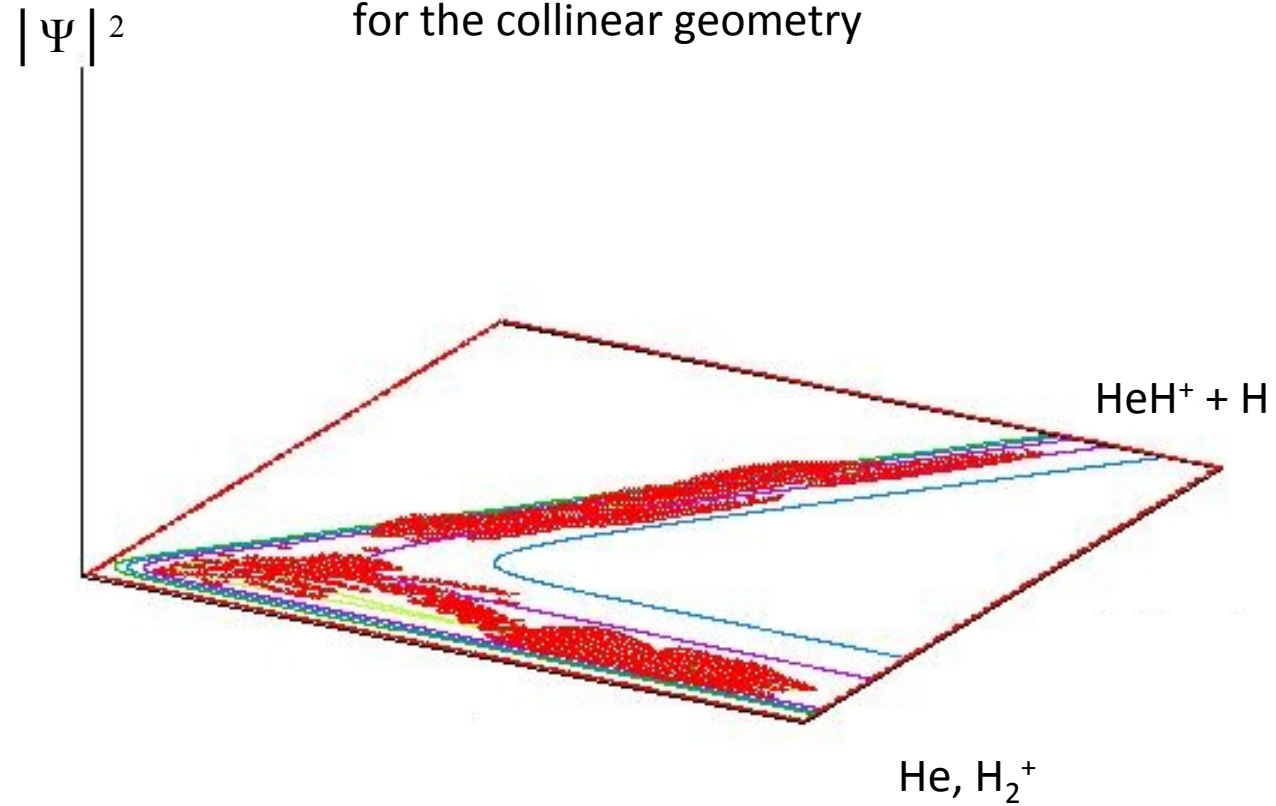

Wave packet dynamics for several hundred femtoseconds

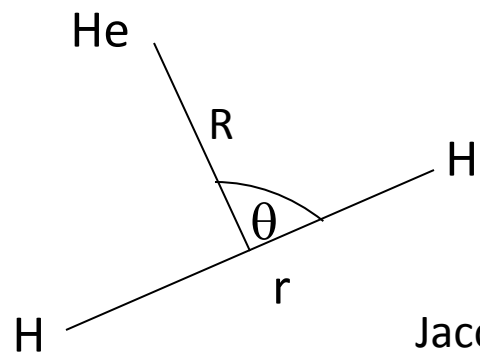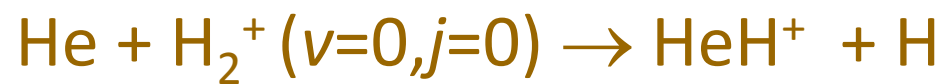

Jacobi coordinates

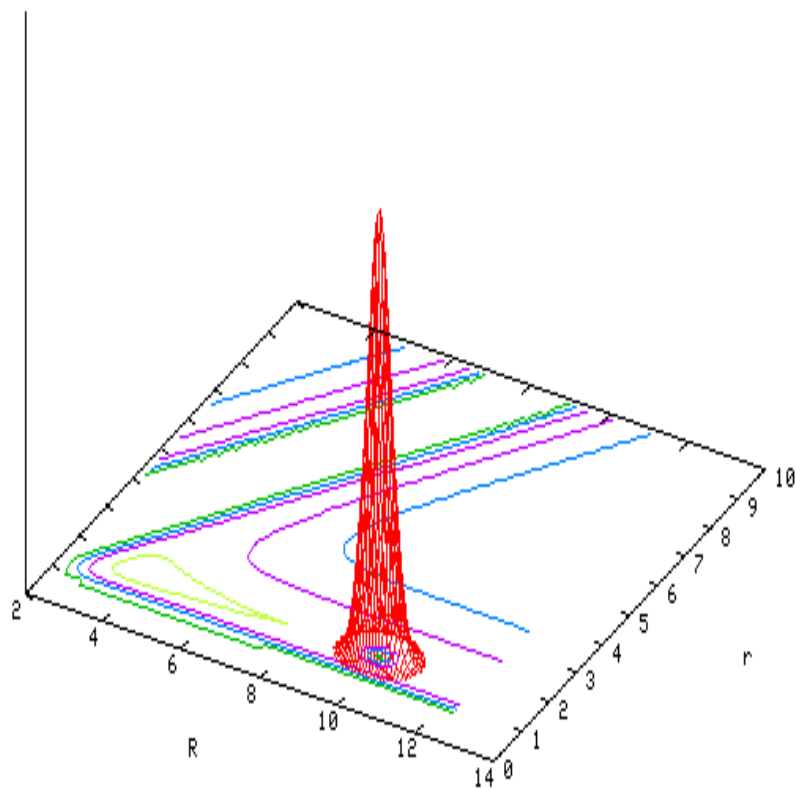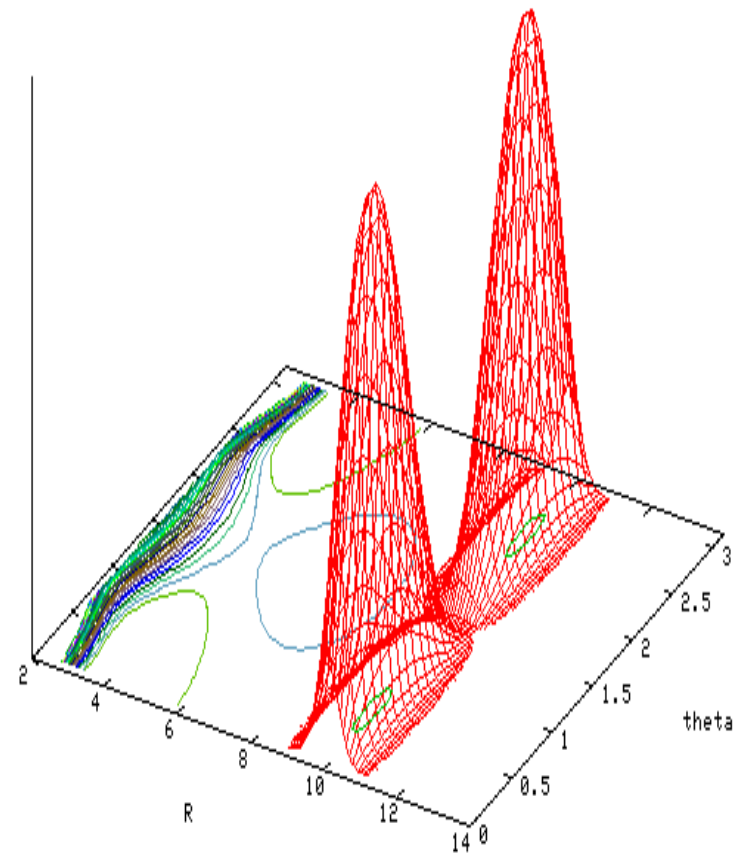

Wave packet dynamics in three dimensions
